# Supplementary material for: Liver injury and prolonged hospitalization as indicators of severity in patients with adenovirus infections
Source: Springer Nature journal article supplement (doi:10.1186/s12879-024-09324-x), 2024-04-22
Supplement: MOESM1 [file 27003444]

**Supplementary Table 1 The normal reference ranges of laboratory examination**

| <b>Parameter</b>                 | <b>Female</b> | <b>Male</b> | <b>Age range</b> |
|----------------------------------|---------------|-------------|------------------|
| <b>Blood system</b>              |               |             |                  |
|                                  | 4.3-6.4       | 4.3-6.4     | 0-24 h           |
|                                  | 4.0-6.8       | 4.0-6.8     | 25-144 h         |
|                                  | 3.7-6.1       | 3.7-6.1     | 7-14 d           |
|                                  | 3.2-5.4       | 3.2-5.4     | 15-28 d          |
| RBC( $\times 10^6/\mu\text{L}$ ) | 3.3-5.2       | 3.3-5.2     | 29-180 d         |
|                                  | 4.0-5.5       | 4.0-5.5     | 6-12 m           |
|                                  | 4.1-5.5       | 4.1-5.5     | 1-<6 y           |
|                                  | 4.2-5.7       | 4.2-5.7     | 6-<13 y          |
|                                  | 4.1-5.4       | 4.4-5.8     | 13-<16 y         |
|                                  | 152-235       | 152-235     | 0-24 h           |
|                                  | 150-240       | 150-240     | 25-144 h         |
|                                  | 127-187       | 127-187     | 7-14 d           |
|                                  | 103-185       | 103-185     | 15-28 d          |
| Hb(g/L)                          | 97-183        | 97-183      | 29-180 d         |
|                                  | 97-141        | 97-141      | 6-12 m           |
|                                  | 107-141       | 107-141     | 1-<2 y           |
|                                  | 112-149       | 112-149     | 2-<6 y           |
|                                  | 118-156       | 118-156     | 6-<13 y          |
|                                  | 110-154       | 120-170     | 13-<16y          |
|                                  | 5.0-30.0      | 5.0-30.0    | 0-72 h           |
|                                  | 5.0-21.0      | 5.0-21.0    | 4-7 d            |
|                                  | 5.0-20.0      | 5.0-20.0    | 8-14 d           |
|                                  | 5.0-19.5      | 5.0-19.5    | 15-28 d          |
| WBC( $\times 10^3/\mu\text{L}$ ) | 4.3-14.2      | 4.3-14.2    | 29-180 d         |
|                                  | 4.8-14.6      | 4.8-14.6    | 6-12 m           |
|                                  | 5.1-14.1      | 5.1-14.1    | 1-<2 y           |
|                                  | 4.4-11.9      | 4.4-11.9    | 2-<5 y           |
|                                  | 4.3-11.3      | 4.3-11.3    | 6-<13 y          |
|                                  | 4.1-11.0      | 4.1-11.0    | 13-<19 y         |
|                                  | 0-88          | 0-88        | 0-24 h           |
|                                  | 0-71          | 0-71        | 25-144 h         |
|                                  | 0-66          | 0-66        | 7-14 d           |
|                                  | 5-60          | 5-60        | 15-28 d          |
| Neutrophil(%)                    | 7-56          | 7-56        | 29-180 d         |
|                                  | 9-57          | 9-57        | 6-12 m           |
|                                  | 13-55         | 13-55       | 1-<2 y           |
|                                  | 22-65         | 22-65       | 2-<6 y           |
|                                  | 31-70         | 31-70       | 6-<13 y          |
|                                  | 37-77         | 37-77       | 13-<19 y         |
| Lymphocyte(%)                    | 0-40          | 0-40        | 0-144 h          |

|                           |           |           |           |
|---------------------------|-----------|-----------|-----------|
|                           | 0-60      | 0-60      | 7-14 d    |
|                           | 20-60     | 20-60     | 15-28 d   |
|                           | 26-83     | 26-83     | 29-180 d  |
|                           | 31-81     | 31-81     | 6-12 m    |
|                           | 33-77     | 33-77     | 1-<2 y    |
|                           | 23-69     | 23-69     | 2-<6 y    |
|                           | 23-59     | 23-59     | 6-<13 y   |
|                           | 17-54     | 17-54     | 13-<19 y  |
| CRP(mg/L)                 | <8        | <8        | <16 y     |
| <b>Liver function</b>     |           |           |           |
|                           | 5.0-101.0 | 5.0-101.0 | 0-27 d    |
|                           | 21.0-80.0 | 21.0-80.0 | 28d-<1 y  |
| AST(U/L)                  | 22.0-59.0 | 22.0-59.0 | 1-<2 y    |
|                           | 14.0-44.9 | 14.0-44.9 | 2-<13 y   |
|                           | 10.0-31.0 | 12.0-37.0 | 13-<18 y  |
|                           | 5.0-71.0  | 5.0-71.0  | 0-27 d    |
|                           | 8.0-71.0  | 8.0-71.0  | 28d-<1 y  |
| ALT(U/L)                  | 8.0-45.9  | 8.0-45.9  | 1-<2 y    |
|                           | 7.0-44.8  | 7.0-44.8  | 2-<13 y   |
|                           | 6.0-44.9  | 7.0-45.4  | 13-<18 y  |
| <b>Kidney function</b>    |           |           |           |
|                           | 28.0-44.0 | 28.0-44.0 | 0-27 d    |
|                           | 28.0-50.0 | 28.0-50.0 | 28 d-<6 m |
| Albumin(g/L)              | 37.9-54.0 | 37.9-54.0 | 6 m-<13 y |
|                           | 39.9-56.0 | 42.0-56.0 | 13-<18 y  |
|                           | 13.0-82.0 | 13.0-82.0 | 0-<3 m    |
|                           | 13.0-56.5 | 13.0-56.5 | 3 m-<2 y  |
|                           | 14.6-56.5 | 14.6-56.5 | 2-<4 y    |
| Creatinine(μmol/L)        | 19.0-52.5 | 19.0-52.5 | 4-<6 y    |
|                           | 27.0-66.0 | 27.0-66.0 | 6-<13 y   |
|                           | 29.2-88.6 | 33.0-93.0 | 13-<16 y  |
|                           | 0.71-5.72 | 0.71-5.72 | 0-<3 m    |
|                           | 0.8-6.1   | 0.8-6.1   | 3-<6 m    |
|                           | 1.1-6.1   | 1.1-6.1   | 6-12 m    |
| Urea(mmol/L)              | 1.3-6.7   | 1.3-6.7   | 1-<2 y    |
|                           | 1.3-6.5   | 1.3-7.0   | 2-<4 y    |
|                           | 2.1-7.1   | 2.1-7.1   | 4-<18 y   |
| <b>Myocardial injury</b>  |           |           |           |
| TnI(μg/L)                 | <0.06     | <0.06     | <16 y     |
| CKMB(μg/L)                | 0.21-5.0  | 0.21-5.0  | <16 y     |
| BNP(pg/L)                 | <100      | <100      | <16 y     |
| <b>Blood gas analysis</b> |           |           |           |
| PH                        | 7.35-7.45 | 7.35-7.45 | <16 y     |
| PO <sub>2</sub> (mmHg)    | 80-100    | 80-100    | <16 y     |

---

| SO <sub>2</sub> | 0.9-1 | 0.9-1 | <16 y |
|-----------------|-------|-------|-------|
|-----------------|-------|-------|-------|

---

Note: RBC, red blood cell; Hb, hemoglobin; WBC, white blood cell; CRP, C-reactive protein; AST, glutamic oxaloacetic transaminase; ALT, glutamic-pyruvic transaminase; TnI, troponin; CKMB, creatine kinase isoenzyme; BNP, B-type brain natriuretic peptide; PaO<sub>2</sub>, arterial oxygen partial pressure; SO<sub>2</sub>, oxygen saturation of blood; h, hour; d, day; m, month; y, year.
